# Supplementary material for: Coordination-driven self-assembly of discrete and polymeric copper(ii) and dicopper(ii) supramolecular structures based on oxacalix[2]benzene[2]pyrazines
Source: Royal Society of Chemistry journal article supplement (doi:10.1039/c000180e), 2010-01-01
Supplement: c000180e.pdf [file c000180e.pdf]

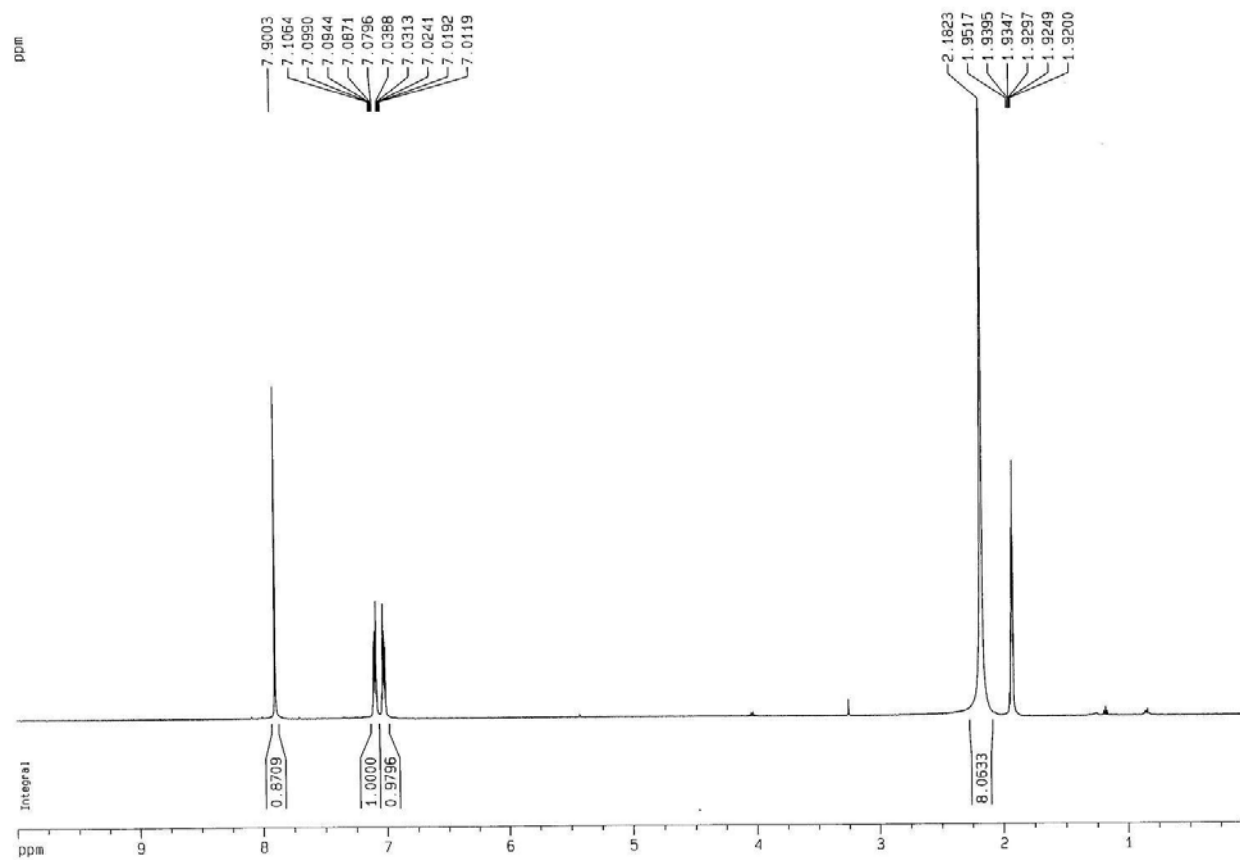

Fig. S1  $^1\text{H}$  NMR spectrum of ligand **1** in  $\text{CD}_3\text{CN}$ .

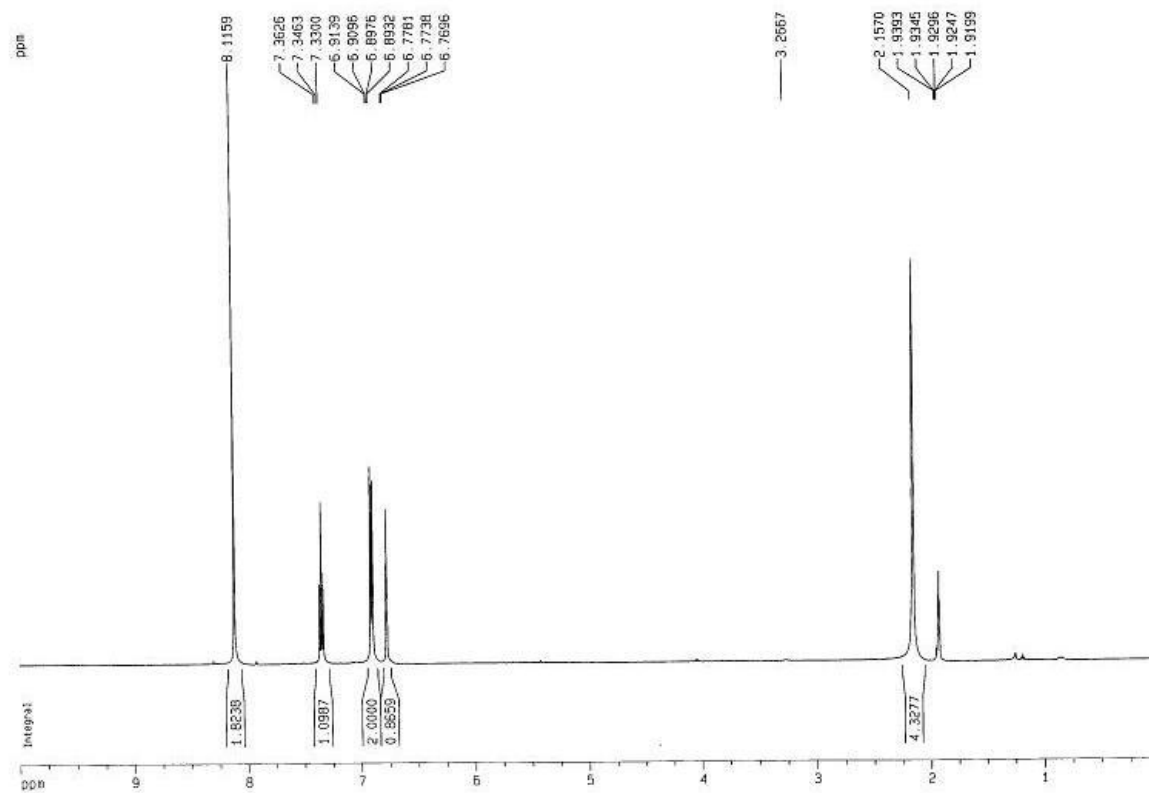

Fig. S2  $^1\text{H}$  NMR spectrum of ligand **2** in  $\text{CD}_3\text{CN}$ .

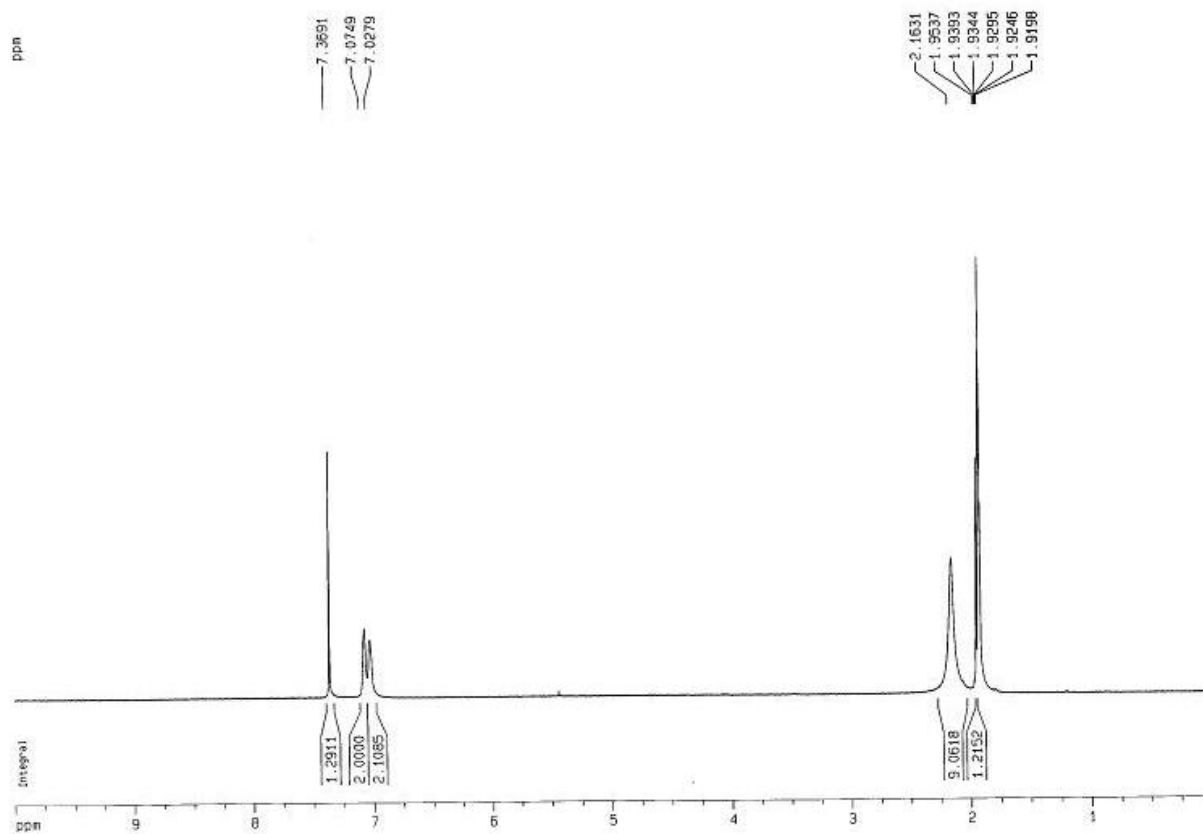

Fig. S3  $^1\text{H}$  NMR spectrum of complex **3** in  $\text{CD}_3\text{CN}$ .

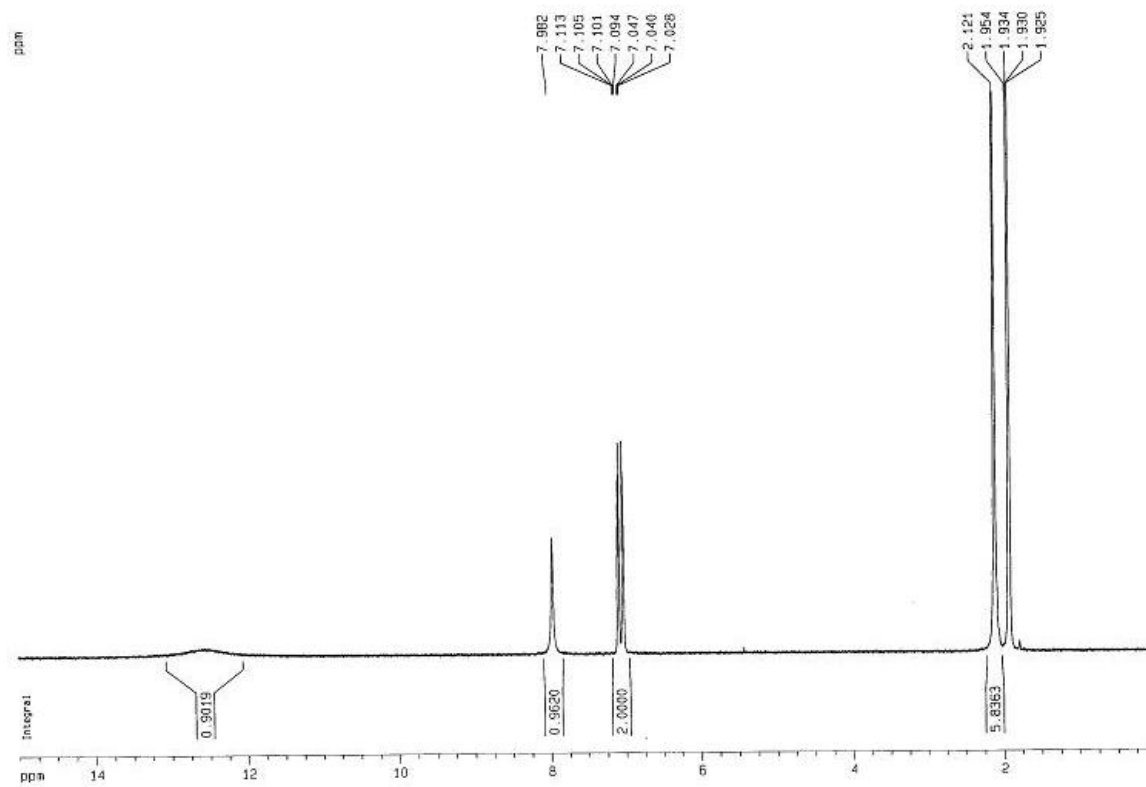

Fig. S4  $^1\text{H}$  NMR spectrum of complex 4 in  $\text{CD}_3\text{CN}$ .

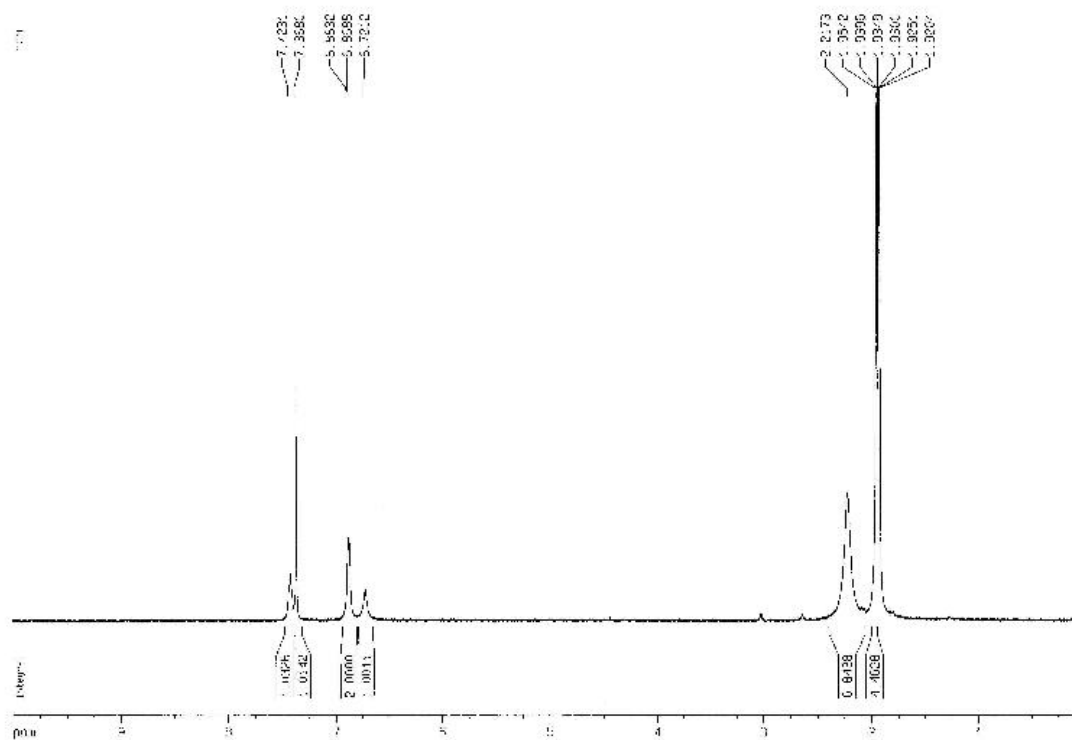

Fig. S5  $^1\text{H}$  NMR spectrum of complex **5** in  $\text{CD}_3\text{CN}$ .

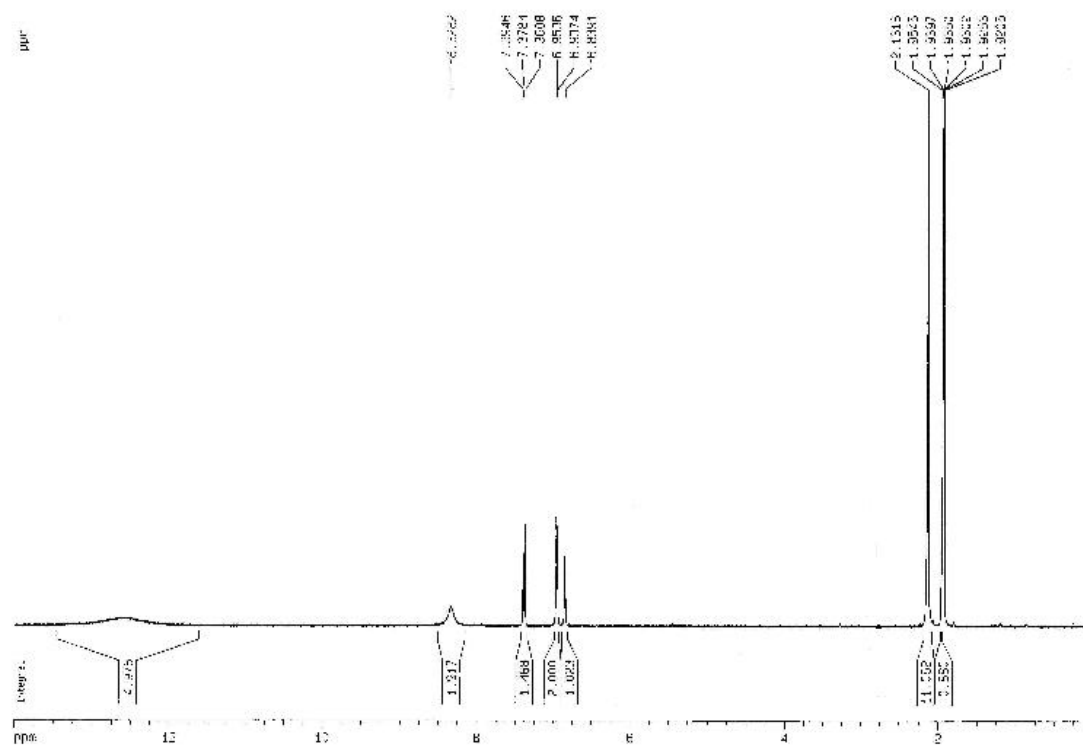

Fig. S6  $^1\text{H}$  NMR spectrum of complex **6** in  $\text{CD}_3\text{CN}$ .

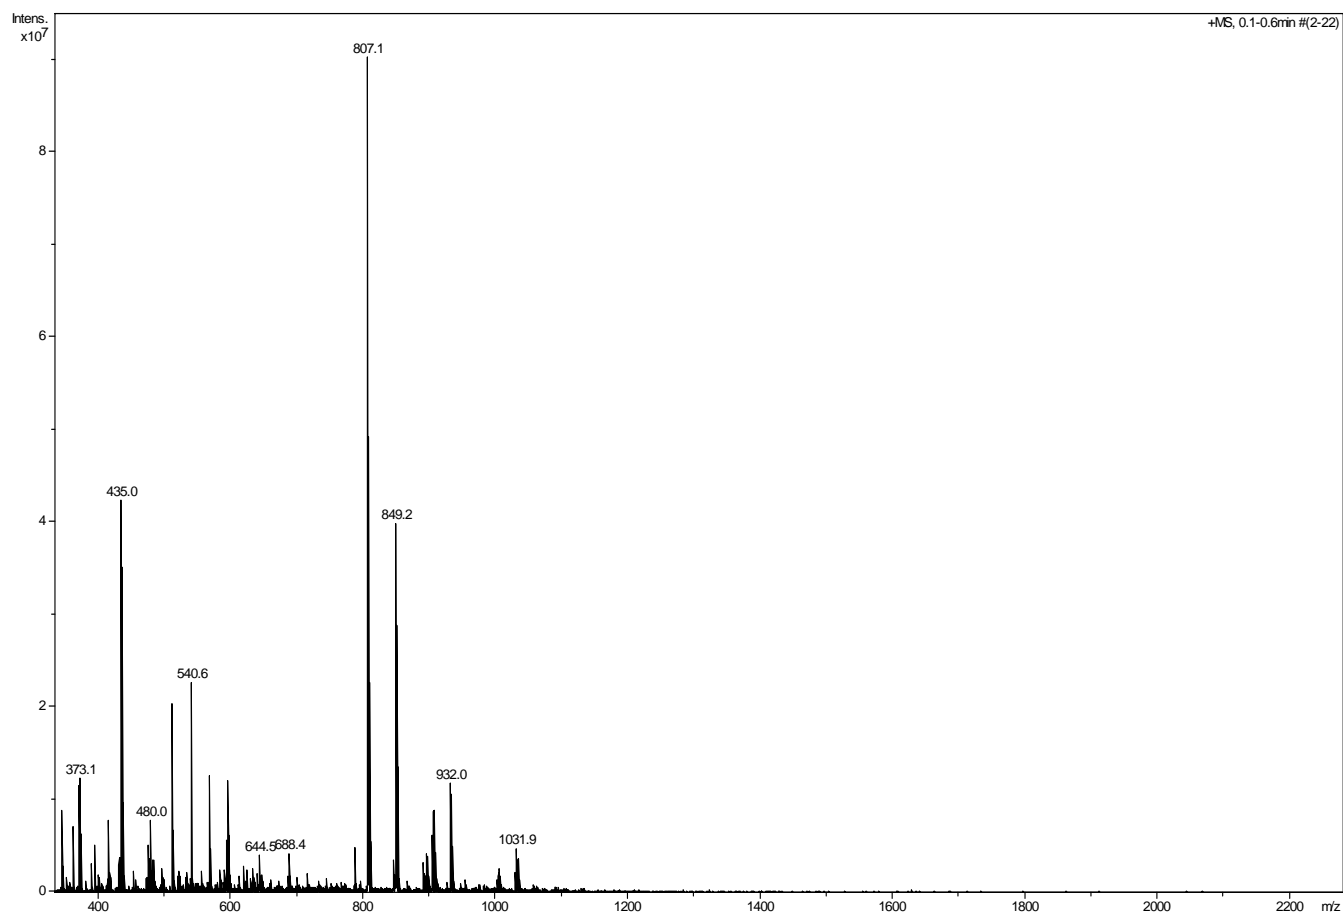

Fig. S7 ESI-MS spectrum of complex **3** in  $\text{CH}_3\text{CN}$ .

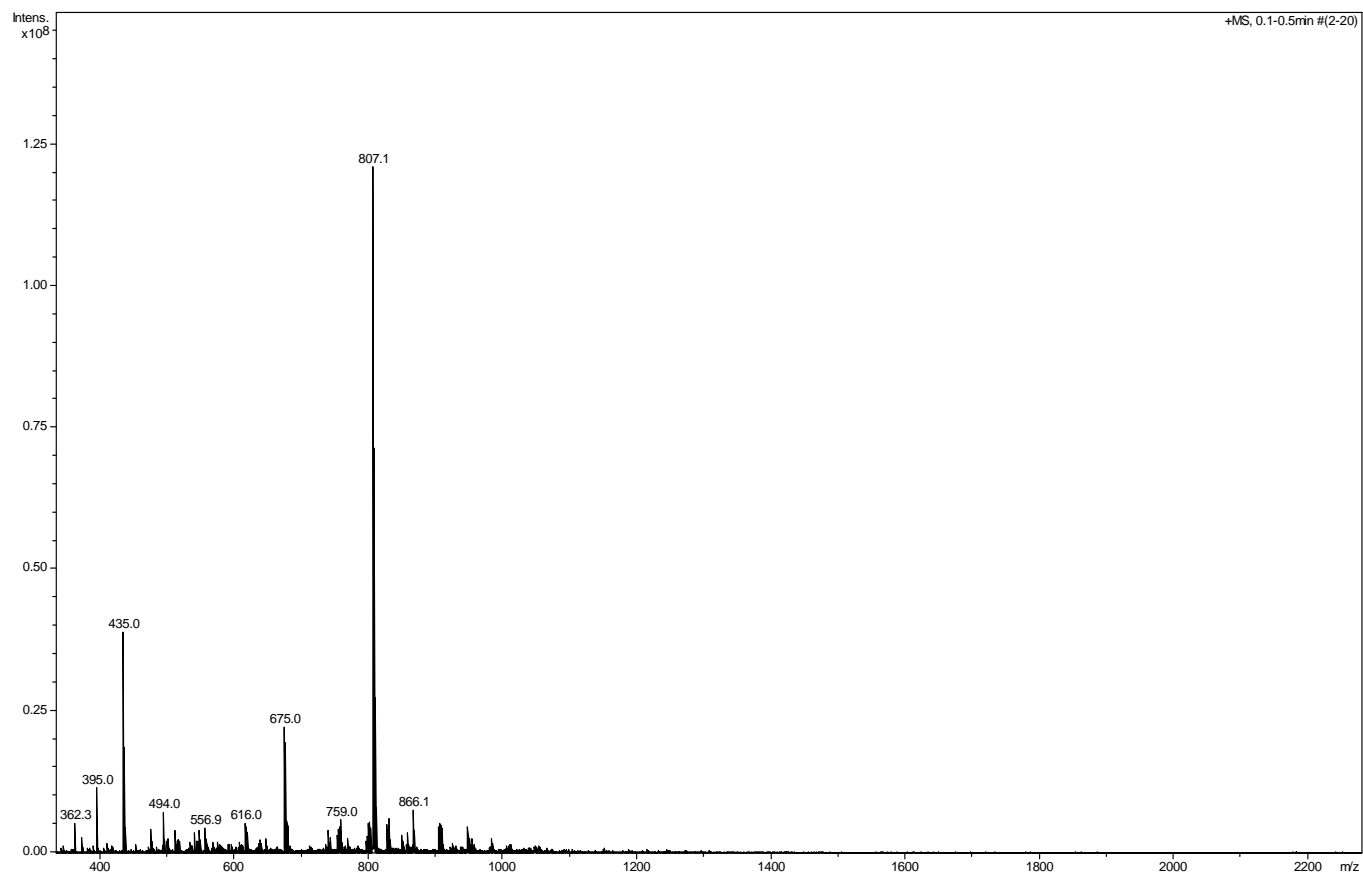

Fig. S8 ESI-MS spectrum of complex **4** in CH<sub>3</sub>CN.



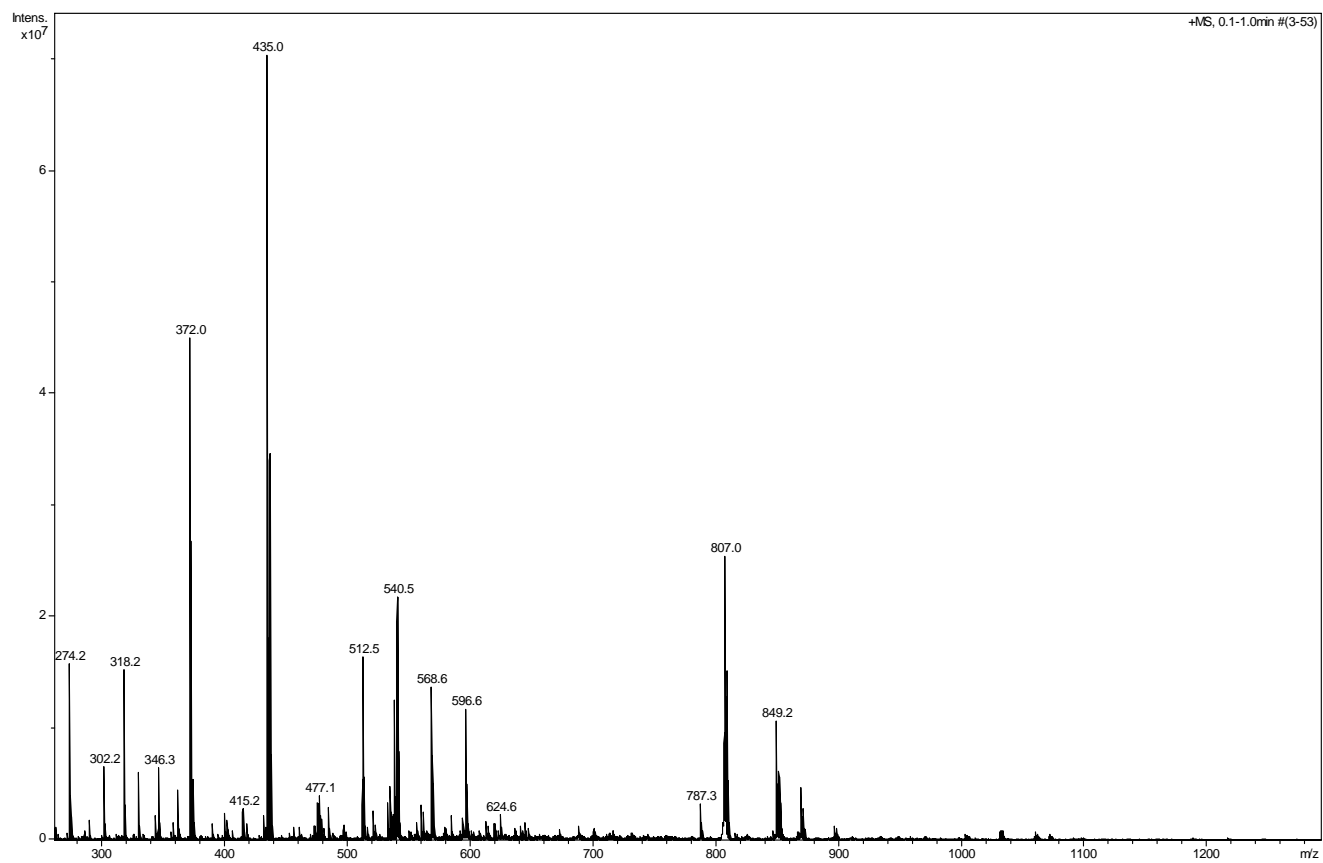

Fig. S9 ESI-MS spectrum of complex **5** in  $\text{CH}_3\text{CN}$ .

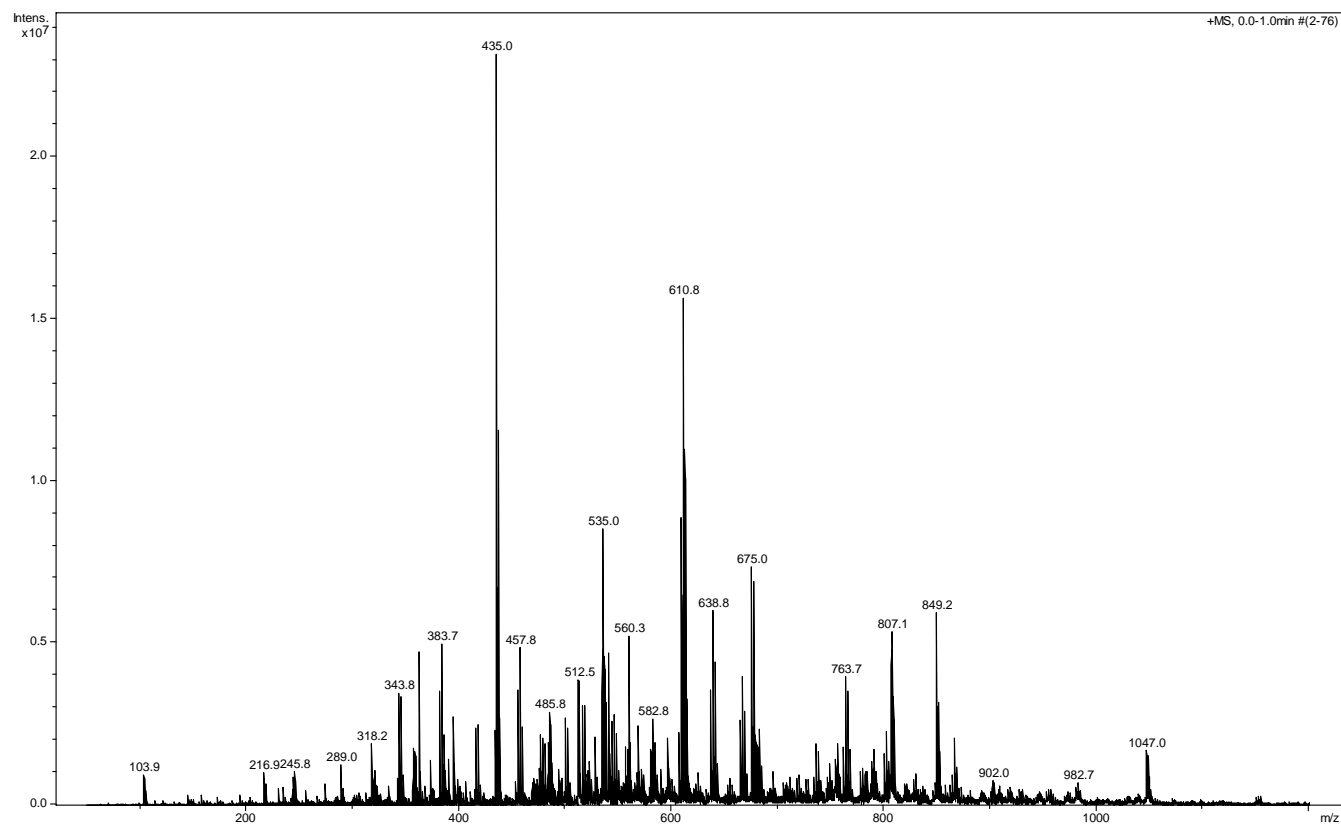

Fig. S10 ESI-MS spectrum of complex **6** in CH<sub>3</sub>CN.

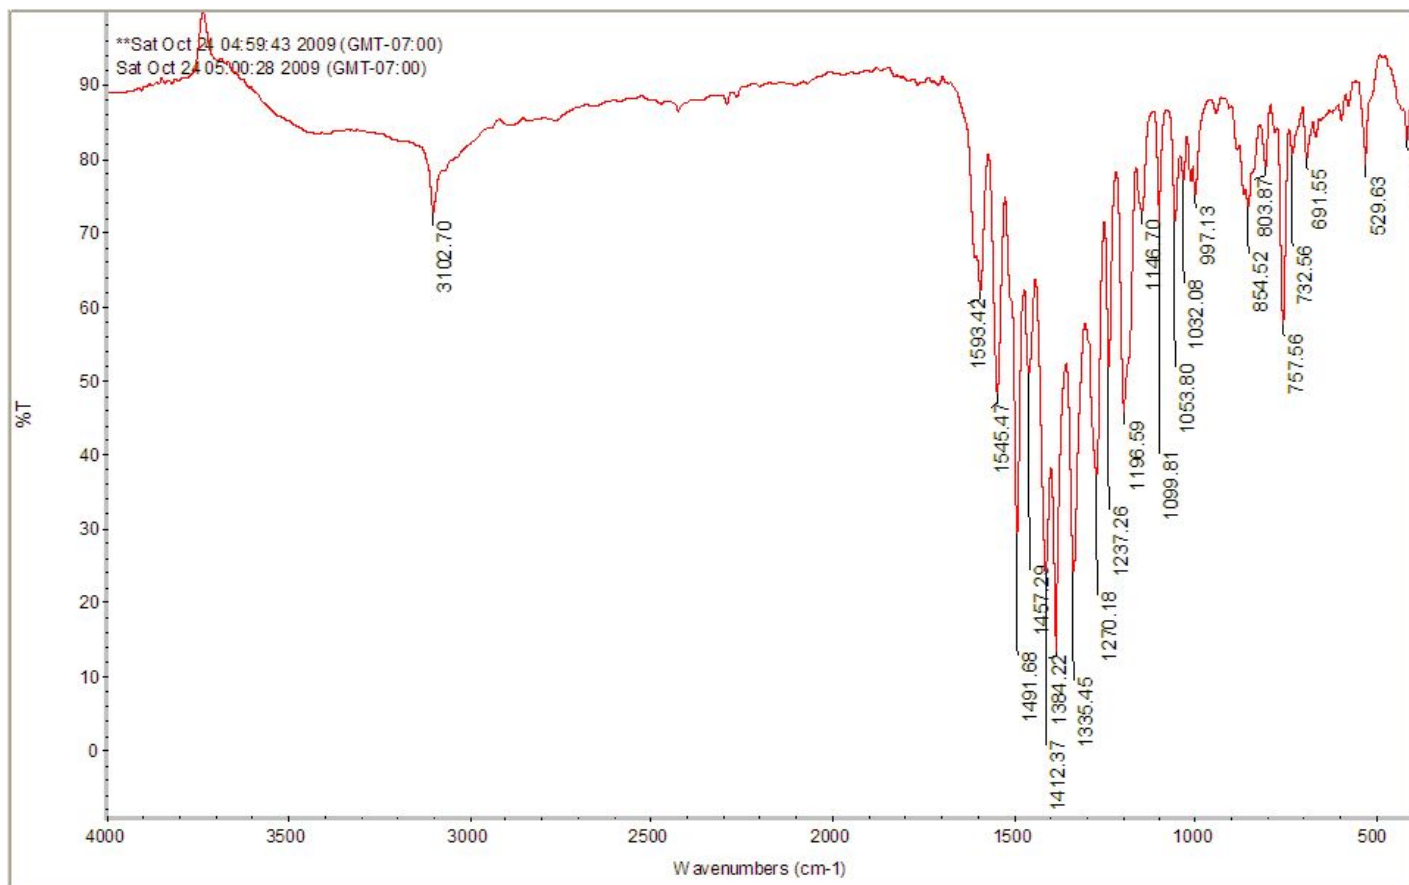

Fig. S11 IR spectrum of complex 3.

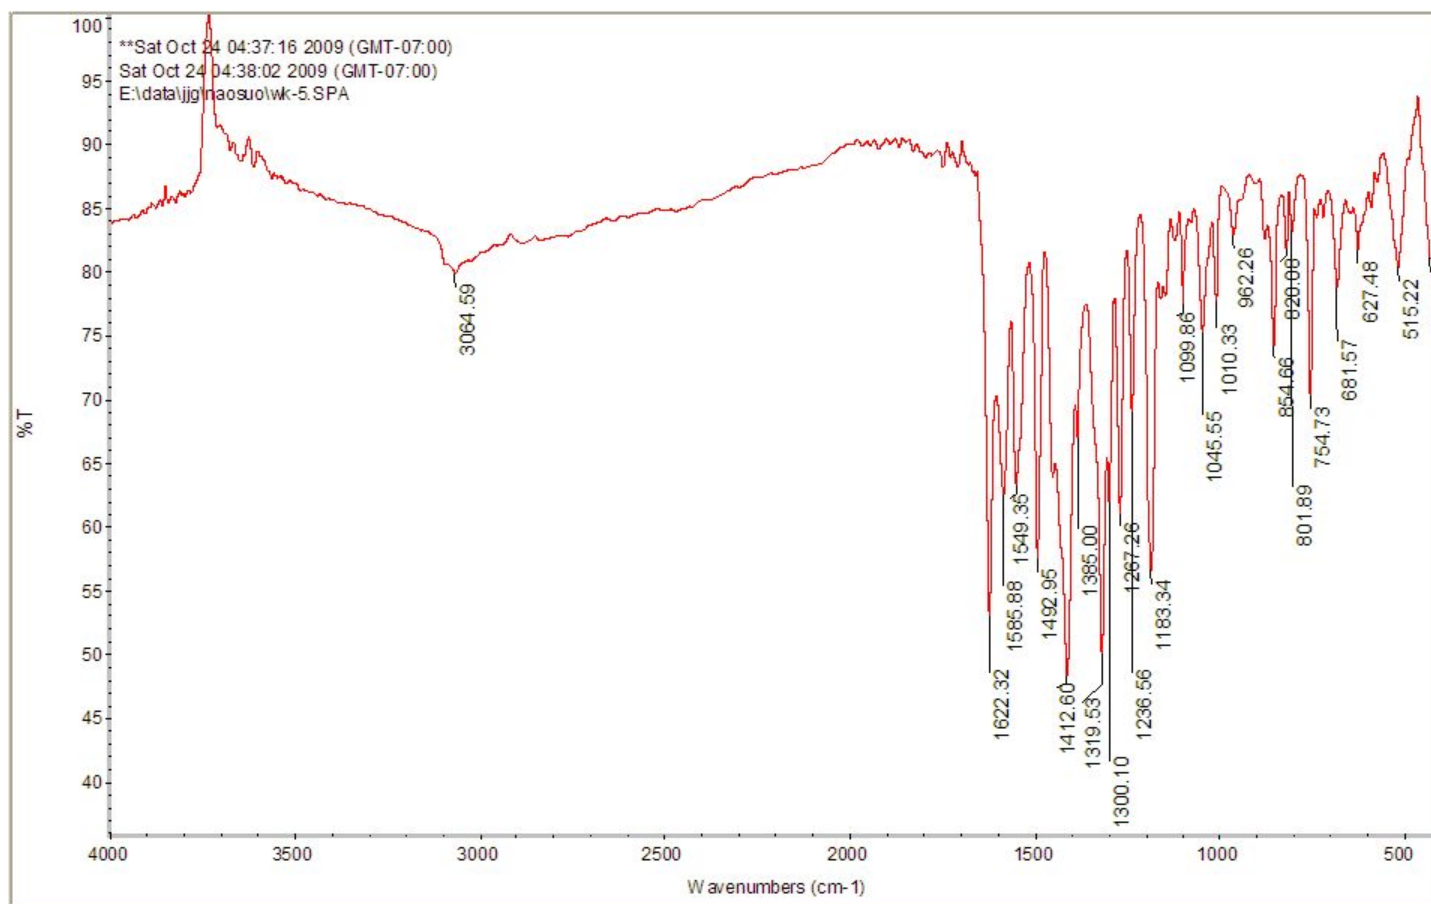

Fig. S12 IR spectrum of complex 4.

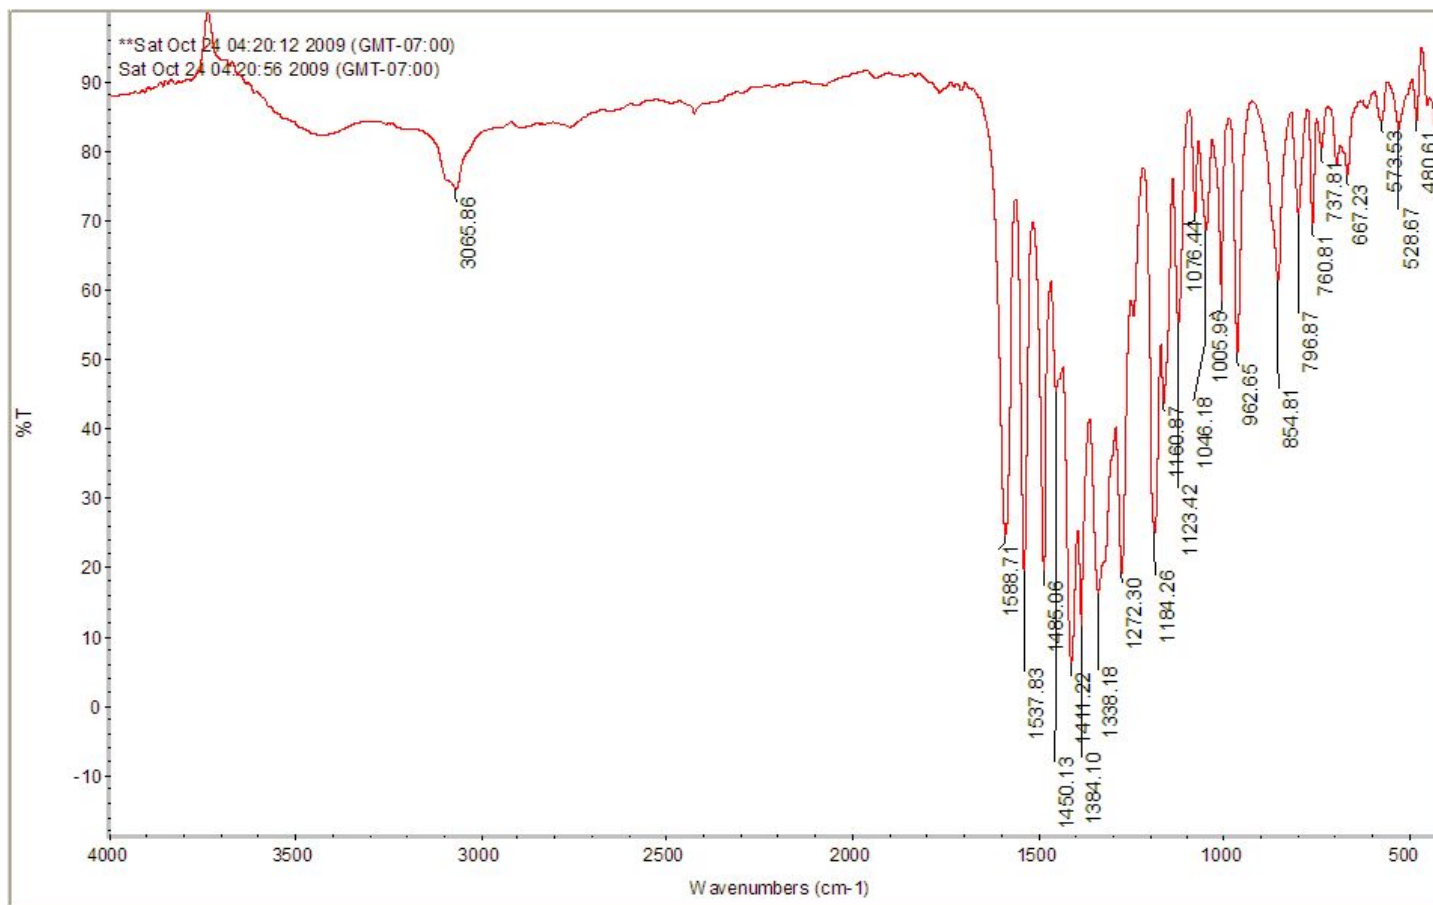

Fig. S13 IR spectrum of complex 5.

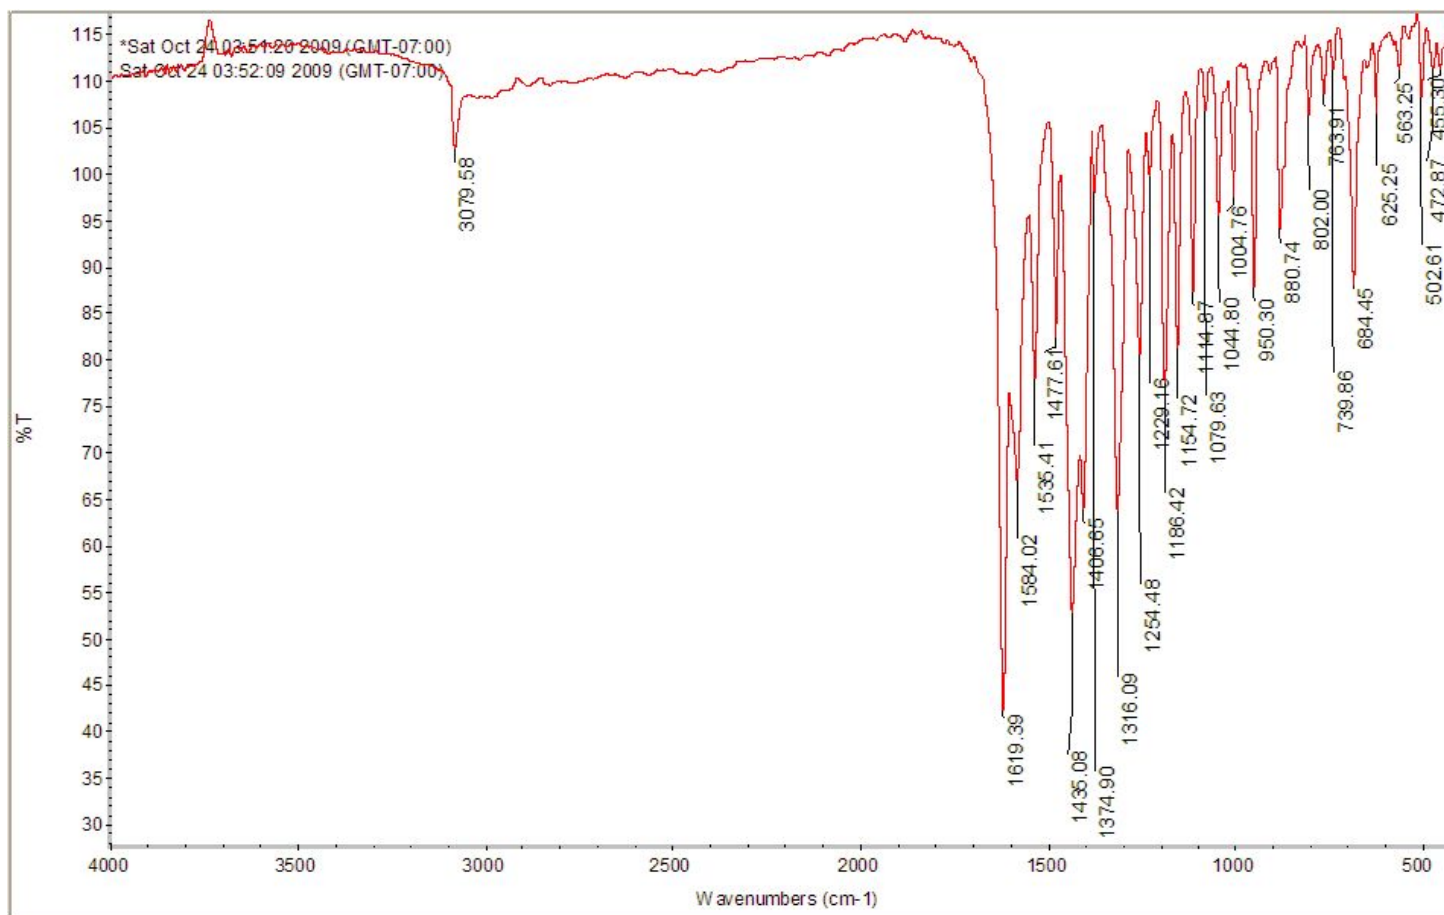

Fig. S14 IR spectrum of complex 6.
